# Supplementary material for: Adoption, Acceptability, and Effectiveness of a Mobile Health App for Personalized Prostate Cancer Survivorship Care: Protocol for a Realist Case Study of the Ned App
Source: PubMed Central journal article supplement (PMC5658643; doi:10.2196/resprot.8051), 2017-10-12
Supplement: resprot_v6i10e197_app1.pdf [file resprot_v6i10e197_app1.pdf]

Adoption, acceptability and effectiveness of a mobile health application for personalised prostate cancer survivorship care: a realist case study of *Ned*.

### Appendix 1. Ned Patient Acceptance and Use of Information Technology Survey

The following statements are meant to assess your acceptance and use of Ned. Please select the number that matches your agreement with the statement.

---

|     | Strongly disagree |   |   |   |   |   | Strongly agree |
|-----|-------------------|---|---|---|---|---|----------------|
|     | 1                 | 2 | 2 | 4 | 5 | 6 | 7              |
| 1.  |                   |   |   |   |   |   |                |
| 2.  |                   |   |   |   |   |   |                |
| 3.  |                   |   |   |   |   |   |                |
| 4.  |                   |   |   |   |   |   |                |
| 5.  |                   |   |   |   |   |   |                |
| 6.  |                   |   |   |   |   |   |                |
| 7.  |                   |   |   |   |   |   |                |
| 8.  |                   |   |   |   |   |   |                |
| 9.  |                   |   |   |   |   |   |                |
| 10. |                   |   |   |   |   |   |                |
| 11. |                   |   |   |   |   |   |                |
| 12. |                   |   |   |   |   |   |                |
| 13. |                   |   |   |   |   |   |                |
| 14. |                   |   |   |   |   |   |                |
| 15. |                   |   |   |   |   |   |                |
| 16. |                   |   |   |   |   |   |                |
| 17. |                   |   |   |   |   |   |                |
| 18. |                   |   |   |   |   |   |                |
| 19. |                   |   |   |   |   |   |                |
| 20. |                   |   |   |   |   |   |                |

---

*Thank you very much for taking the time to answer these questions!*
